# Supplementary material for: A phage display-based strategy for the de novo creation of disulfide-constrained and isomer-free bicyclic peptide affinity reagents
Source: Royal Society of Chemistry journal article supplement (doi:10.1039/c7cc09142g), 2018-01-01

# **Electronic Supplementary Information for**

## **A phage display-based strategy for the *de novo* creation disulfide-constrained and isomer-free bicyclic peptide affinity reagents**

Mirao Zha, Ping Lin, Hongwei Yao, Yibing Zhao, Chuanliu Wu\*

*Department of Chemistry, College of Chemistry and Chemical Engineering, The MOE  
Key Laboratory of Spectrochemical Analysis and Instrumentation, State Key  
Laboratory of Physical Chemistry of Solid Surfaces, Xiamen University, Xiamen,  
361005, P.R. China.*

\*To whom correspondence should be addressed, Email: [chlwu@xmu.edu.cn](mailto:chlwu@xmu.edu.cn)

## **Supplementary method**

- 1.1 Construction of phage library
- 1.2 Rescue and amplification of phage
- 1.3 Expression and purification of Keap1 kelch domain
- 1.4 Biotinylation of Keap1 protein
- 1.6 Phage titration
- 1.7 Amplification of monoclonal phage
- 1.8 Monoclonal phage ELISA
- 1.9 Peptide synthesis and purification
- 1.10 Oxidative folding of peptides
- 1.11 Fluorescence polarization (FP) competition assay
- 1.12 NMR characterization

## **Supplementary data**

Figure S1: FP competition assays for the bicyclic peptides

Figure S2: FP competition assays for the linear and monocyclic peptides

Figure S3: HPLC chromatograms and kinetics of peptide digestion by trypsin

Figure S4: HPLC chromatograms and kinetics of peptide digestion by trypsin

Figure S5: NMR characterization of XM-3 isomer-I and **p2**.

Figure S6: HPLC chromatograms and FP competition assays for XM-2 **p1**

Figure S7: HPLC chromatograms and FP competition assays for XM-10 **p1** and **p2**

Figure S8: HPLC chromatograms showing the isomerization of bicyclic peptides

Figure S9: Mass spectra of the Pen-substituted peptides

## **References**

Chromatograms of the Sanger sequencing of the 23 peptide sequences

### *1.1 Construction of Phage library*

The genes encoding random peptides -GCXCX<sub>5</sub>CX<sub>5</sub>C- were appended in a PCR reaction. Gel-purified *Sfi* I/*Not* I-digested DNA and pCantab 5E was ligated after the determination of the optimum insert/vector ratio (10/1). Transforming the ligation mix into ER2738 yields  $4.52 \times 10^9$  colonies on plates, and then colonies were scraped from the plates with the 2YT media and stored at  $-80^{\circ}\text{C}$  with the addition of 20% v/v glycerol.

### *1.2 Rescue and Amplification of Phage*

Inoculated 2YT-G (2YT with 2% w/v Glucose) with the library glycerol stock to reach an OD<sub>600</sub> of 0.1, incubated at  $37^{\circ}\text{C}$  until OD<sub>600</sub> reach 0.6-0.8. 20 Fold-excess of helper phage M13KO7 was then added to the culture and incubated at  $37^{\circ}\text{C}$  for 1 h to infect the cells. Centrifuged the cells and discarded the supernatant. Resuspended the cell pellet in 2YT-AK (2YT with 100  $\mu\text{g}/\text{mL}$  Ampicilin and 50  $\mu\text{g}/\text{mL}$  Kanamycin) and incubated at  $30^{\circ}\text{C}$  overnight. Centrifuged the cells and added 20% v/v PEG-NaCl (20% w/v PEG-8000 with 2.5 M NaCl) to the supernatant to precipitate the phages. Centrifuged and discarded the supernatant, and resuspended the phage pellets in PBS (pH 7.4), and then centrifuged to remove any remaining cell debris. Repeated the process of the phage precipitation one more time to get purer phage pellets and resuspended the phage library in PBS (pH 7.4) containing 30% v/v glycerol. Finally, the phage library was filtered through a  $0.45\ \mu\text{m}$  filter and stored at  $-80^{\circ}\text{C}$ .

### *1.3 Expression and purification of Keap1 kelch domain*

The DNA region coding for Keap1 kelch domain (residues 321-609) was constructed and cloned into pET-15b vector, the resulting plasmid was used to transform BL21 (DE3) competent cells. Cells were grown in LB medium at  $37^{\circ}\text{C}$  and induced with 0.2 mM isopropyl- $\beta$ -D-thiogalactopyranoside (IPTG) at an OD<sub>600</sub> of 0.6. After 8~12 h, Cells were harvested and lysed in Buffer A (100 mM Tris/500 mM NaCl/1 mM PMSF, pH 7.9) by sonication. The supernatant was applied to Ni-sepharose column bound with  $\text{Ni}^{2+}$  and washed with Buffer A. Then, the Keap1 kelch domain was eluted

with Buffer E (100 mM Tris/500 mM NaCl/200 mM imidazole, pH 7.9) and further purified on a Superdex<sup>TM</sup> 75 10/300 GL column (GE Healthcare).

#### *1.4 Biotinylation of Keap1 protein*

The KEAP1 kelch-domain was biotinylated at a concentration of 5  $\mu$ M with a 5-fold molar excess of Sulfo-NHS-LC-biotin (Pierce, Rockford, IL, USA) in PBS (pH 7.4) at RT for 0.5 h. The unreacted free Sulfo-NHS-LC-biotin was removed by size exclusion chromatography with desalt column on an AKTA pure system (GE Healthcare) with PBS (pH 7.4) as the running buffer.

#### *1.5 Target immobilization and panning*

The target immobilization and panning experiments were conducted as described by Chen et al<sup>[1]</sup>. Streptavidin-coated magnetic beads (Dynabeads M-280 Streptavidin, Invitrogen, 100  $\mu$ L; or neutravidin-coated beads for the second round) was washed twice with Binding buffer (10 mM Tris-Cl, 150 mM NaCl, 10 mM MgCl<sub>2</sub>, 1 mM CaCl<sub>2</sub>, pH7.4) before distributing into two tubes equally. Biotinylated target (1~5  $\mu$ g) was added to one of the two tubes, and the same volume of buffer to the second tube, incubate the tubes on a rotator at room temperature for 10 min. Put the tubes on a magnet for 2 min and discarded the supernatants. The beads were washed with binding buffer for three times prior to blocking of the beads with 150  $\mu$ L binding buffer and 300 $\mu$ L Blocking buffer (Binding buffer with 0.3% v/v Tween-20 and 3% w/v BSA) on a rotator for 30min at room temperature, in parallel, the phage library ( $10^{12}$ ~ $10^{13}$  t.u.) dissolved in 3ml binding buffer were blocked by addition of 1.5 mL Blocking buffer. The blocked beads with and without immobilized target proteins were mixed with blocked phage library and co-incubated on a rotator for 30 min at room temperature. After the incubation, discarded the supernatant and wash the beads for eight times with Washing buffer (Binding buffer with 0.1% v/v Tween-20) and twice with Binding buffer. During the period, the tubes were replaced at least three times. After all the washing steps, the buffer was removed, and the phages were

eluated by resuspending the beads in 200  $\mu$ L Elution buffer (50 mM glycine, pH 2.2) and incubate for exactly 5 min, then the supernatant is transferred to a tube containing 50  $\mu$ L Neutralization buffer (1 M Tris-Cl, pH 8.0).

### *1.6 Phage Titration*

Serially diluted the phages by ten folds with the 2YT media. 20  $\mu$ L of each dilution was added to 180  $\mu$ L ER2738 log-phase culture and incubated for 30min at 37 °C (No Shaking). Spread 10  $\mu$ L of each infected cell onto LB-A plates (LB plates containing 100 $\mu$ g/mL Ampicilin) and incubated overnight at 37 °C. Counted the colonies on the plate, and calculated the titer of the phage preparation (Colony Forming Unit per ml).

### *1.7 Amplification of Monoclonal Phage*

Inoculated 1 mL of 2YT-AG with individual colonies from the plates generated by titration of eluted phages and incubated overnight with shaking at 37 °C. Transfer 600  $\mu$ L culture of each colony to 6 mL 2YT-AG and incubate with shaking at 37 °C for 2 h (add 15% v/v glycerol to the remaining 400  $\mu$ L culture and store at –80°C), added 20  $\mu$ L PBS containing  $6 \times 10^{10}$  helper phage M13KO7 to each culture and incubated for 30 min at 37 °C without shaking and followed by 30min with vigorous shaking. Centrifuged at 4500g for 10 min, and resuspended the pellets in 6 mL 2YT-AK media and incubated at 30 °C overnight with shaking. Centrifuged at 4500 g for 10 min to discard the cell pellet, and added 20% v/v PEG-NaCl to the supernatant and incubated on ice for at least 1 h. Centrifuged at 9000 g for 10 min and resuspended the phages in 1 mL blocking buffer.

### *1.8 Monoclonal Phage ELISA*

Coated Maxisorp 96-plate with 0.1  $\mu$ g/well Keap1 kelch domain (0.1  $\mu$ g/100  $\mu$ L in Binding buffer) and incubated for 1 h at room temperature. Wash the wells with 3 $\times$ 200  $\mu$ L Washing buffer. Block the wells with 200  $\mu$ L/well Blocking buffer and incubate for 1.5 h at room temperature. Washed the wells with 3 $\times$ 200  $\mu$ L Washing buffer. Added 100  $\mu$ L/well phage stock of each colony to plate and incubate for 1.5 h

at room temperature. Add 100  $\mu$ L/well anti-M13-Mab-HRP antibody dissolved in Blocking buffer to the plate and incubate for 30min at room temperature. Washed the wells with 5 $\times$ 200  $\mu$ L Washing buffer. Developed ELISA with TMB substrate (Sangon, China) and measured the optical density at 450 nm.

### *1.9 Peptides synthesis and purification*

Acetonitrile (ACN), trifluoroacetic acid (TFA), N,N'-diisopropylcarbodiimide (DIC) and thioanisole were purchased from Tokyo Chemical Industry (Shanghai).

1,2-Ethanedithiol (EDT) was purchased from Macklin (Shanghai). MBHA resin and Fmoc-protected amino acids were purchased from GL Biochem (Shanghai).

1-Hydroxybenzotriazole (HOBt) was purchased from Adamas-beta (Shanghai).

N-dimethyl formamide (DMF), diethyl ether, and phenol were purchased from Sinopharm (Shanghai). All linear peptides were synthesized on a CEM Discover Liberty BLUE microwave-assisted peptide synthesizer by standard solid phase peptide synthesis approach on MBHA resin. Fmoc groups were removed by 20% vol piperidine in DMF, peptides were cleaved from the resin and side-chains were deprotected using TFA /thioanisole/H<sub>2</sub>O/phenol/EDT (90 /2.5/ 2.5/2.5 /2.5 v/v, 4 ml). The ether-precipitated crude peptides were purified by semi-preparative reverse-phase high performance liquid chromatography (RP-HPLC), and the molecular masses of the purified peptides were confirmed with MALDI-TOF mass spectroscopy.

### *1.10 Oxidative folding of peptides*

All the peptides screened from the library were oxidized in 50% v/v DMSO /100 mM phosphate buffer (pH 7.4) in room temperature for 12 h at a concentration of 100  $\mu$ M unless otherwise stated. And all Pen-substituted peptides were oxidized in 50% v/v DMSO/100 mM phosphate buffer containing 0.5 mM oxidized glutathione (pH 7.4) in room temperature for 6 h at a concentration of 100  $\mu$ M.

### *1.11 Fluorescence polarization (FP) competition assay*

Fluorescence polarization (FP) competition assays were conducted as described

before<sup>[2]</sup>. All the FP assays were performed in 10 mM PBS on 96-well flat-bottom OptiPlate black plate using an Infinite 200 PRO microplate reader. For the FP binding assay, a 8-point dilution was added to the Lobind tubes (Eppendorf, Germany) , followed by FITC-ETGE (FITC-[ $\beta$ -ala]-DEETGEF-OH) for a total volume to 300 $\mu$ L with a final peptide concentration of 20 nM . Samples were incubated at room temperature for 10 min before read on plate by 125  $\mu$ L/well. The binding curves were fitted by equation below.

$$y = A_0 + (A_{max} - A_0) \times \frac{(x + c + K_d) - \sqrt{(x + c + K_d)^2 - 4 \times x \times c}}{2c}$$

x is the concentration of protein, y is the recorded fluorescence anisotropy, c is the concentration of FITE-ETGE,  $A_0$  and  $A_{max}$  is the minimum and maximum value on the curve, respectively.

For the FP competition assay, 9-point dilutions of peptides were added to the 10 mM PBS containing 20 nM FITC-ETGE and 300 nM Keap1 kelch domain. Samples were incubated at room temperature for 10 min (125  $\mu$ L/well) before read on plate. The competition curves were fitted by the one-site competition model in Graphpad and the  $K_i$  values were calculated. All FP assays were performed in triplicate.

### 1.12 NMR experiments

All NMR experiments were conducted at 298 K on a Bruker 850 MHz spectrometer. 2D  $^{13}\text{C}$ - $^1\text{H}$  HSQC and  $^1\text{H}$ - $^1\text{H}$  TOCSY ( $\tau_m=80$  ms) spectra were measured to obtain backbone and side chain resonance assignments. 2D  $^1\text{H}$ - $^1\text{H}$  NOESY spectra with a mixing time of 300 ms were measured to analyze the disulfide connectivity. All NMR spectra were processed using NMRPipe<sup>[3]</sup> and analyzed using NMRFAM-SPARKY<sup>[4]</sup>.  $^1\text{H}$  chemical shifts were referenced to internal 3-(Trimethylsilyl) propionic acid- $d_4$  (TSP), and  $^{13}\text{C}$  chemical shifts were indirectly referenced to TSP<sup>[5]</sup>.

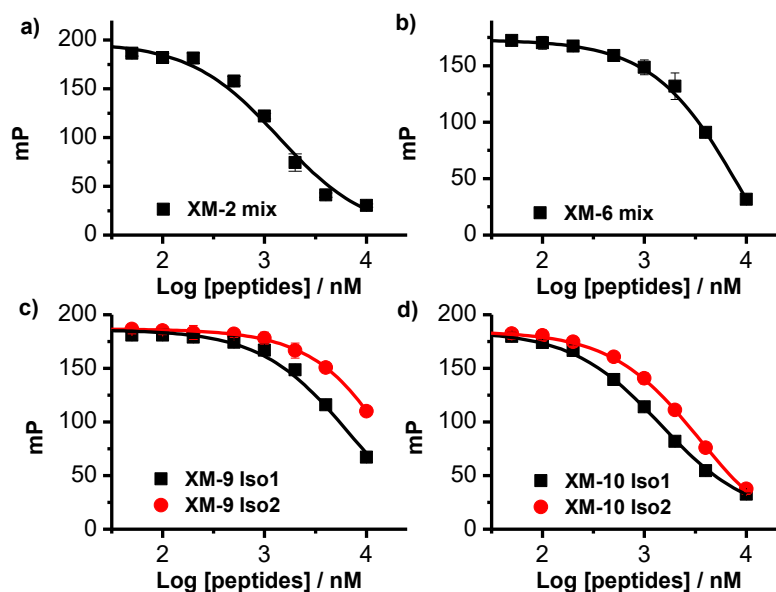

**Figure S1.** FP competition assays determine the binding interaction of bicyclic peptides with the Keap1 protein. a) XM-2 mixtures formed in 50% DMSO/100mM phosphate buffer (pH 7.4) ( $K_i = 1167 \pm 172$  nM). b) XM-6 mixtures formed in 50% DMSO/100mM phosphate buffer (pH 7.4) ( $K_i = 8684 \pm 2530$  nM). c) XM-9 bicyclic isomer-I (with the longer retention time on the HPLC chromatogram,  $K_i = 9522 \pm 2024$  nM) and isomer-II ( $K_i = 26150 \pm 6709$  nM). d) XM-10 bicyclic isomer-I (with the longer retention time on HPLC chromatogram,  $K_i = 1030 \pm 74$  nM) and isomer-II ( $K_i = 2407 \pm 115$  nM).



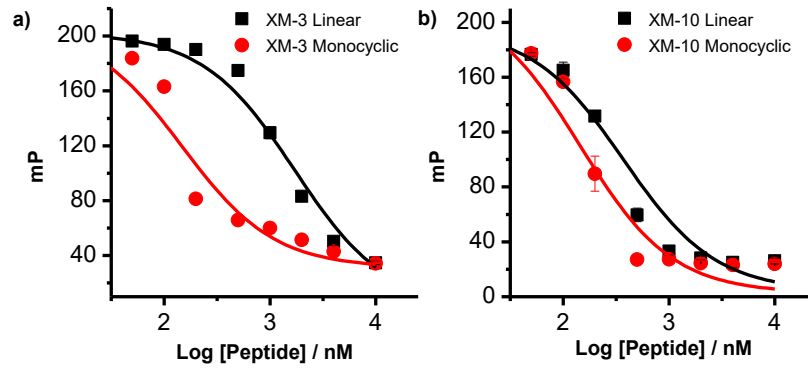

**Figure S2.** FP competition assays determine the interaction of peptides with the Keap1 kelch domain; a) XM-3 Linear ( $K_i = 120.8 \pm 5.5$  nM) and XM-3 Monocyclic ( $K_i = 1255.3 \pm 76.0$  nM); b) XM-10 Linear ( $K_i = 129.6 \pm 9.8$  nM) and XM-10 Monocyclic ( $K_i = 205.9 \pm 6.8$  nM).

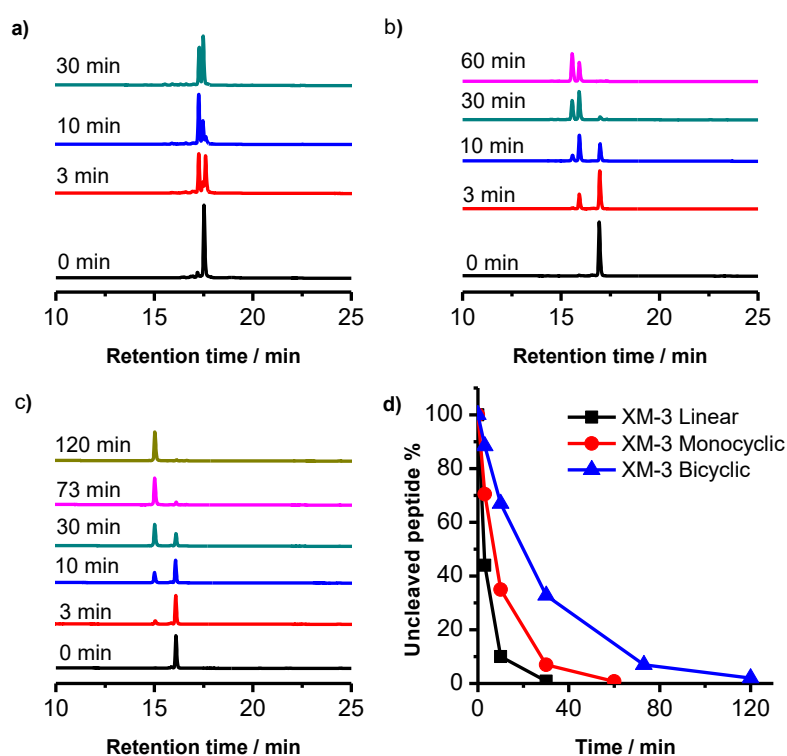

**Figure S3.** HPLC chromatograms of 40  $\mu$ M peptides digested by 20 nM Trypsin; a) XM-3 Linear: reduced form of XM-3 Mono (GCGAAGWRDAESGERC); b) XM-3 Monocyclic: monocyclic peptide formed by oxidative folding of reduced XM-3 Mono in 100 mM phosphate buffer containing 50% DMSO; c) XM-3 Bicyclic: XM-3 isomer-I. d) Digestion kinetics of the three peptides mentioned above by trypsin.

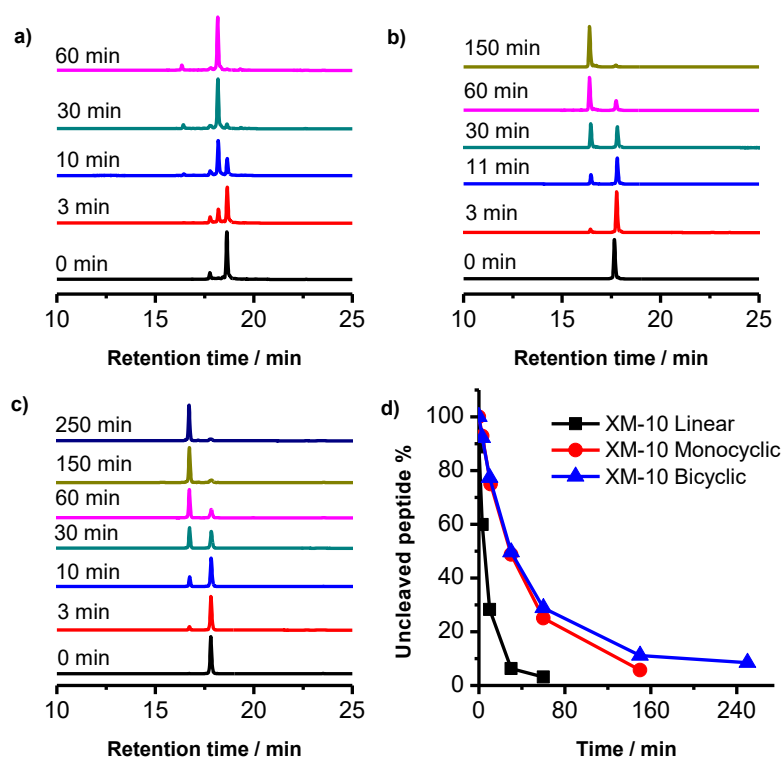

**Figure S4.** HPLC chromatograms of 40  $\mu$ M peptides digested by 20 nM Trypsin; a) XM-10 Linear: reduced form of XM-10 Mono (GCGAWEEEDAETGERC); b) XM-10 Monocyclic: monocyclic peptide formed by oxidative folding of reduced XM-10 Mono in 100 mM phosphate buffer containing 50% DMSO; c) XM-10 Bicyclic: XM-10 isomer-I. d) Digestion kinetics of the three peptides mentioned above by trypsin.

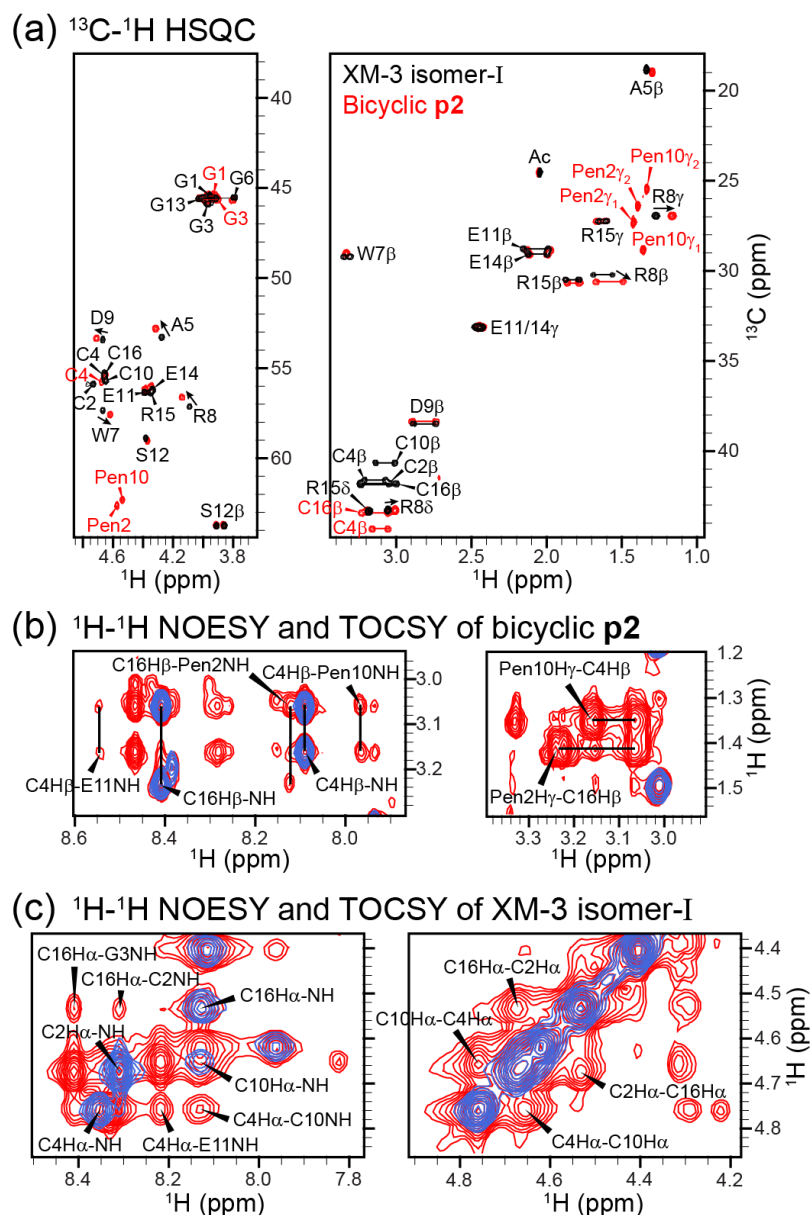

**Figure S5.** NMR characterization of XM-3 isomer-I and **p2**. a) 2D  $^{13}\text{C}$ - $^1\text{H}$  and  $^1\text{H}$ - $^1\text{H}$  correlation spectra of XM-3 isomer-I (black) and **p2** (red) in  $\text{H}_2\text{O}/\text{D}_2\text{O}$  (90%/10%, v/v); left: backbones, right: side chains. b) 2D  $^1\text{H}$ - $^1\text{H}$  NOESY (red) and TOCSY (blue) spectra of **p2** in  $\text{H}_2\text{O}/\text{D}_2\text{O}$  (90%/10%, v/v). c) 2D  $^1\text{H}$ - $^1\text{H}$  NOESY (red) and TOCSY (blue) spectra of XM-3 isomer-I in  $\text{DMSO}-d_6$ . For clarity, only two local regions were shown and cysteine related assignments were labeled.

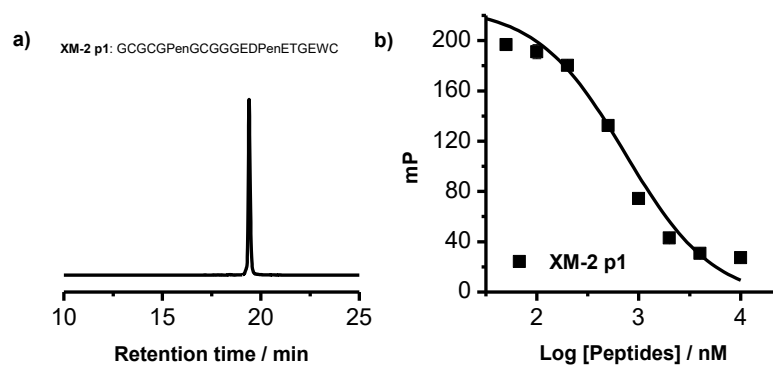

**Figure S6.** a) Amino acid sequence of XM-2 **p1** and HPLC chromatogram showing the formation of bicyclic peptides from oxidative folding of the reduced peptide in 100 mM PB buffer containing 50% DMSO and 0.5mM GSSG (pH 7.4). b) FP competition assays determine the interaction of peptides XM-2 **p1** ( $K_i = 502.4 \pm 29.2$  nM) with the Keap1 kelch domain.

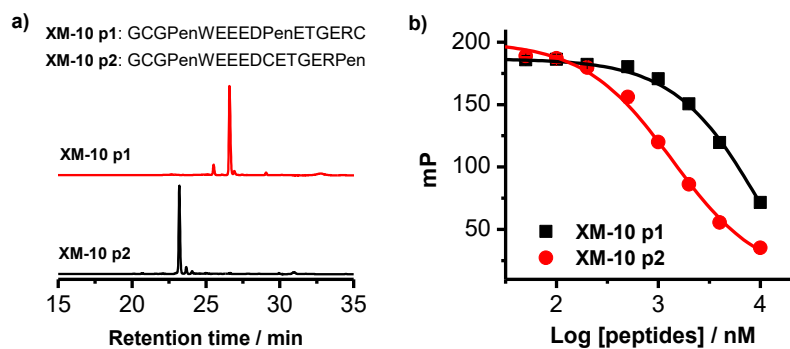

**Figure S7.** a) Amino acid sequence of XM-10 **p1** and **p2** and HPLC chromatograms showing the formation of bicyclic peptides from oxidative folding of the reduced peptides in 100 mM PB buffer containing 50% DMSO and 0.5mM GSSG (pH 7.4). b) FP competition assays determine the interaction of peptides XM-10 **p1** ( $K_i = 7524 \pm 728$  nM) and **p2** ( $K_i = 1139 \pm 51$  nM) with the Keap1 kelch domain.

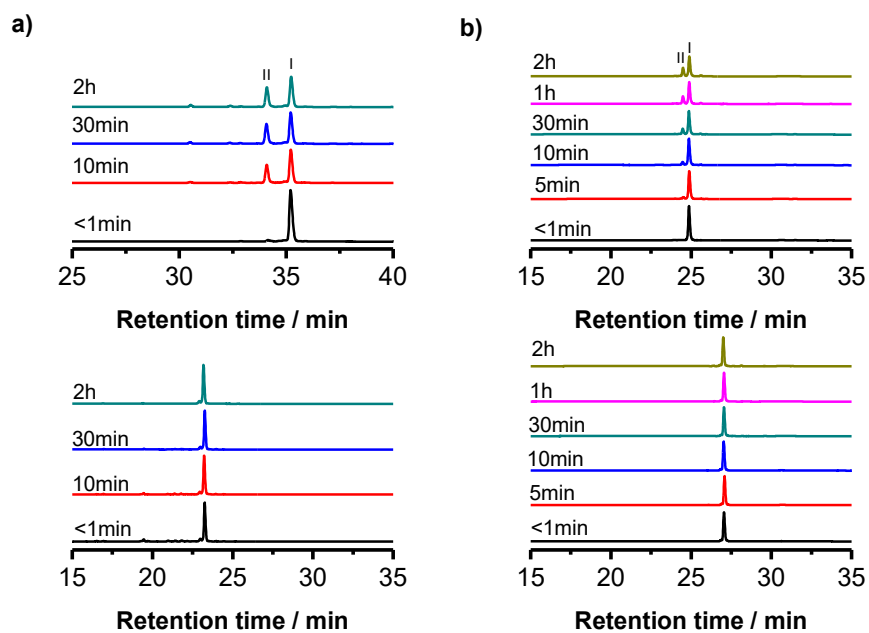

**Figure S8.** HPLC chromatograms showing the disulfide isomerization of bicyclic peptides in GSH/GSSG buffer; a) Top: 40  $\mu$ M XM-3 isomer-I in 0.5 mM GSSG/0.5 mM GSH/100 mM phosphate buffer (pH 7.4). Bottom: 40  $\mu$ M XM-3 **p2** under the same condition; b) Top: 40  $\mu$ M XM-10 isomer-I in 0.5 mM GSSG/0.5 mM GSH/100 mM phosphate buffer (pH 7.4). Bottom: 40  $\mu$ M XM-10 **p2** under the same condition.

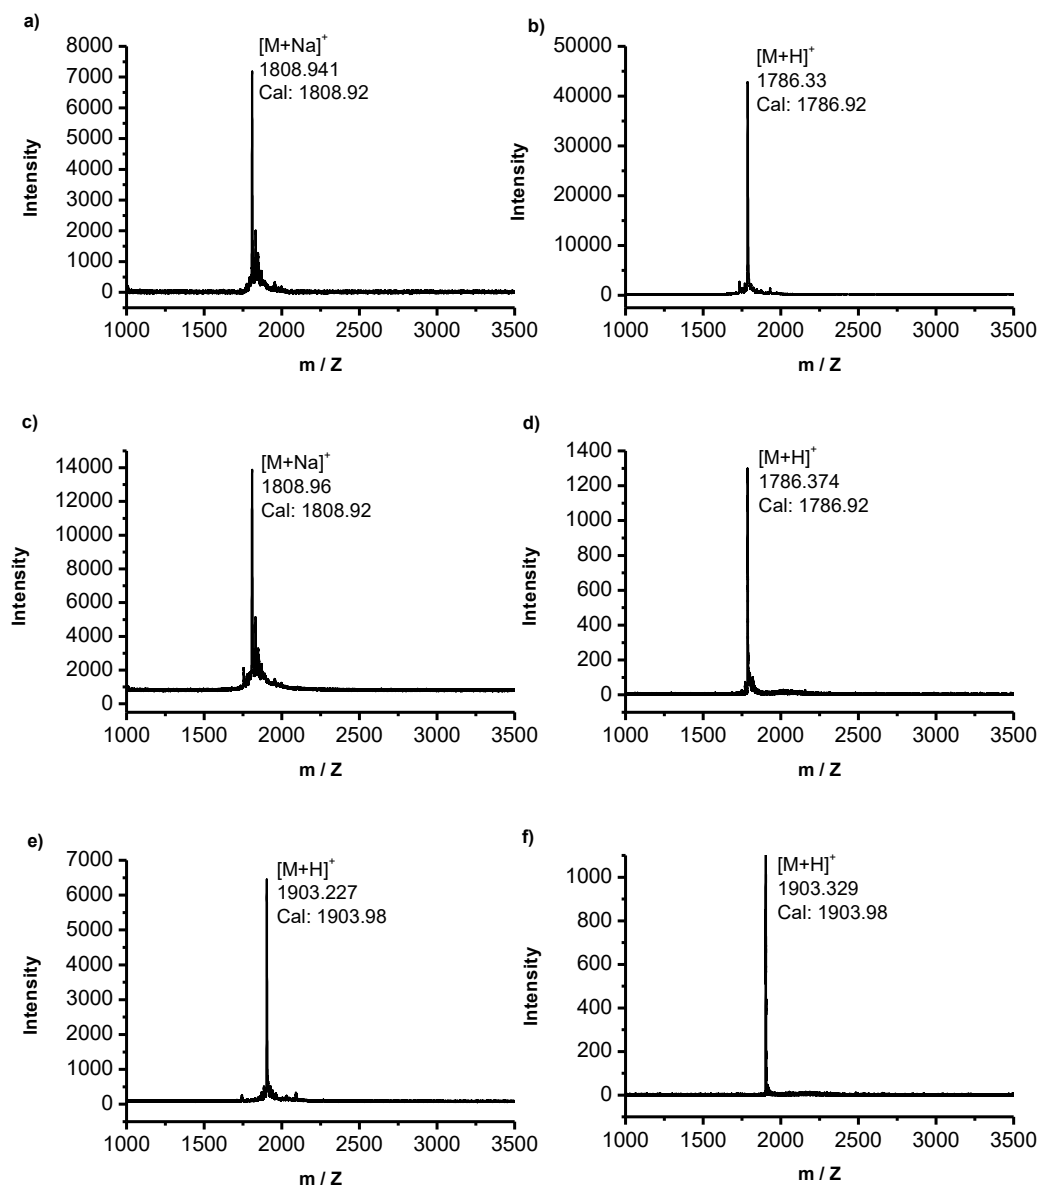

**Figure S9.** Mass spectra of the Pen-substituted peptides; a) XM-3 **p1**, b) XM-3 **p2**, c) XM-3 **p3**, d) XM-3 **p4**, e) XM-10 **p1**, and f) XM-10 **p2**.



## References

- [1] S. Chen, C. Heinis, *Methods Mol. Biol.*, **2015**, 1248, 119-137.
- [2] J. Wang, M. Zha, Q. Fei, W. Liu, Y. Zhao, C. Wu, *Chem. Eur. J.*, **2017**, 23, 15150-15155.
- [3] F. Delaglio, S. Grzesiek, G.W. Vuister, G. Zhu, J. Pfeifer, A. Bax, *J. Biomol. NMR.* **1995**, 6, 277-293.
- [4] W. Lee, M. Tonelli, J.L. Markley, *Bioinformatics.* **2015**, 31, 1325-1327.
- [5] J.L. Markley, A. Bax, Y. Arata, C.W. Hilbers, R. Kaptein, B.D. Sykes, P.E. Wright, K. Wuthrich, *Pure Appl. Chem.* **1998**, 70, 117-142.

## Chromatograms of the Sanger sequencing of the 23 peptide sequences

XM-1:

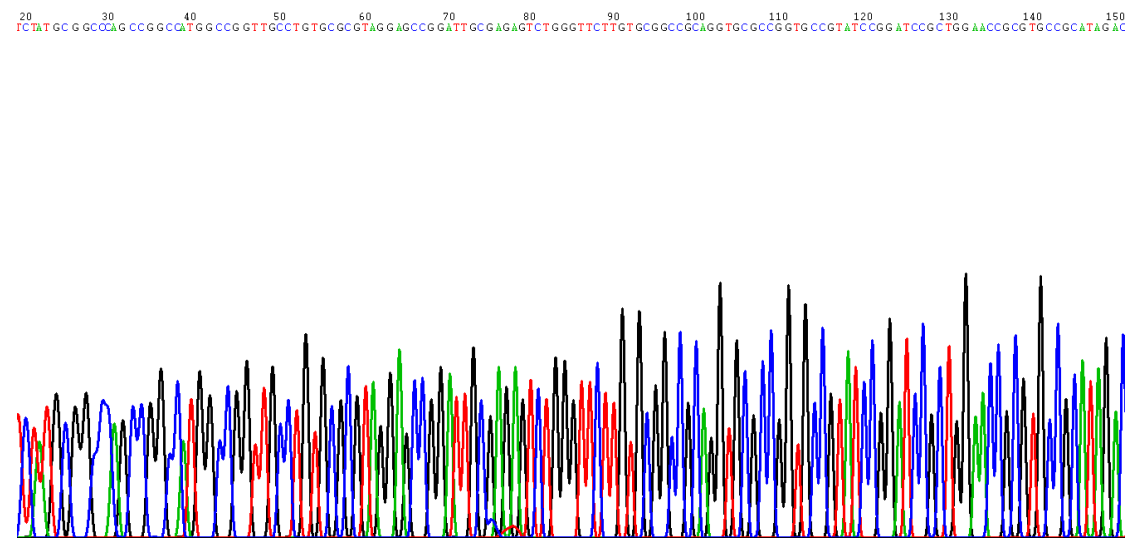

XM-2:

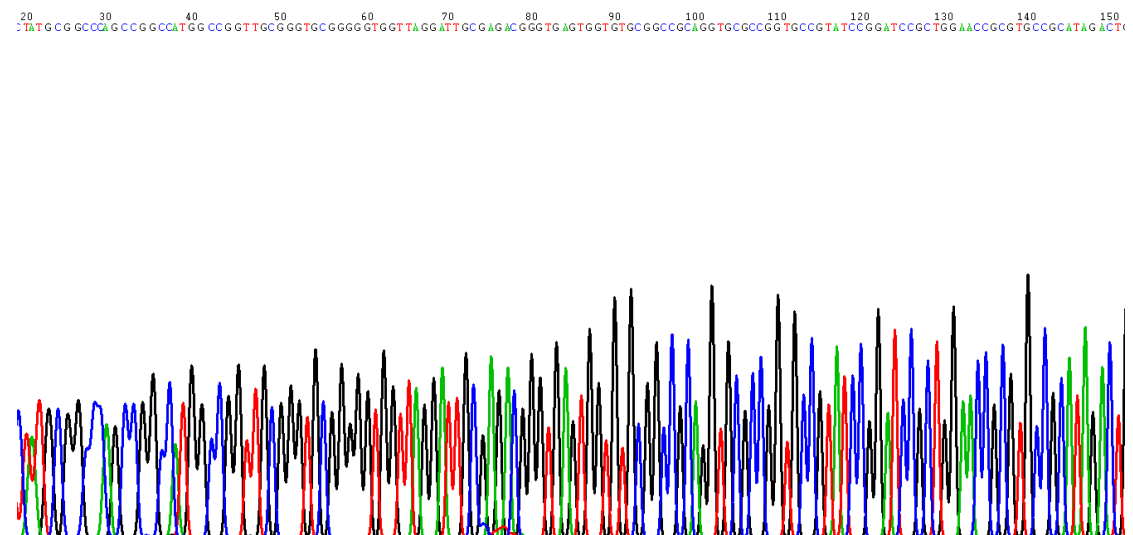

XM-3:

20 30 40 50 60 70 80 90 100 110 120 130 140 150  
:TATGCGGCCAGCCGGCCATGGCCGGTTGCGGGTGC GCGGGGTGGAGGGATTTCGGA GTCGGGGGAGCGGTGTGCGGCCGCAAGGTGCGCCGGTGCCCGTATCCGGATCCGCTGGAAACCGCGTGCCGCATAGACTGT

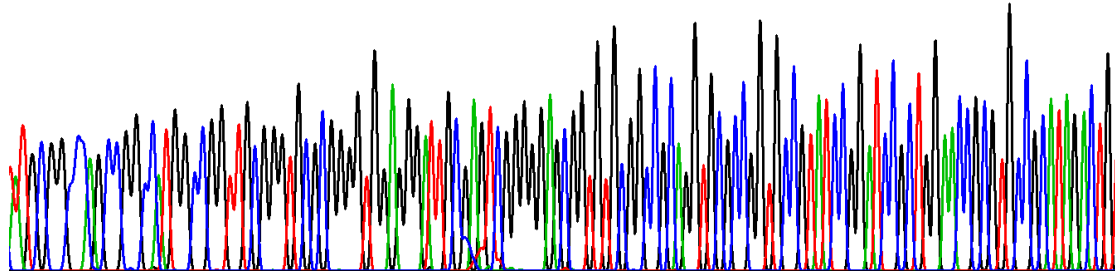

XM-4:

20 30 40 50 60 70 80 90 100 110 120 130 140 150  
:TATGCGGCCAGCCGGCCATGGCCGGTTGCGGA GTCGA GACGGGGAGGGGTGGGGTTTGGGTGGGTAGTGTCCGGCCGCAAGGTGCGCCGGTGCCCGTATCCGGATCCGCTGGAAACCGCGTGCCGCATAGACTGT

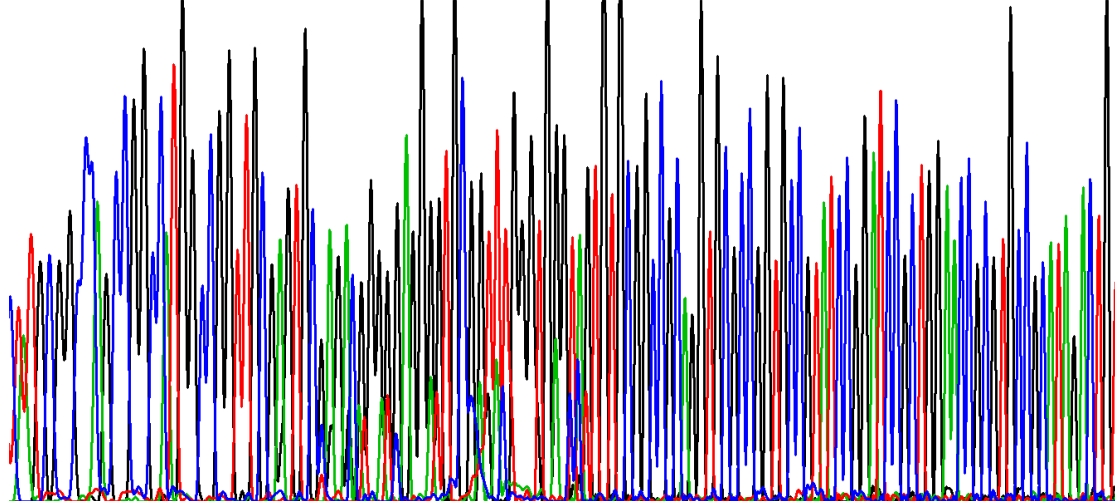

XM-5:

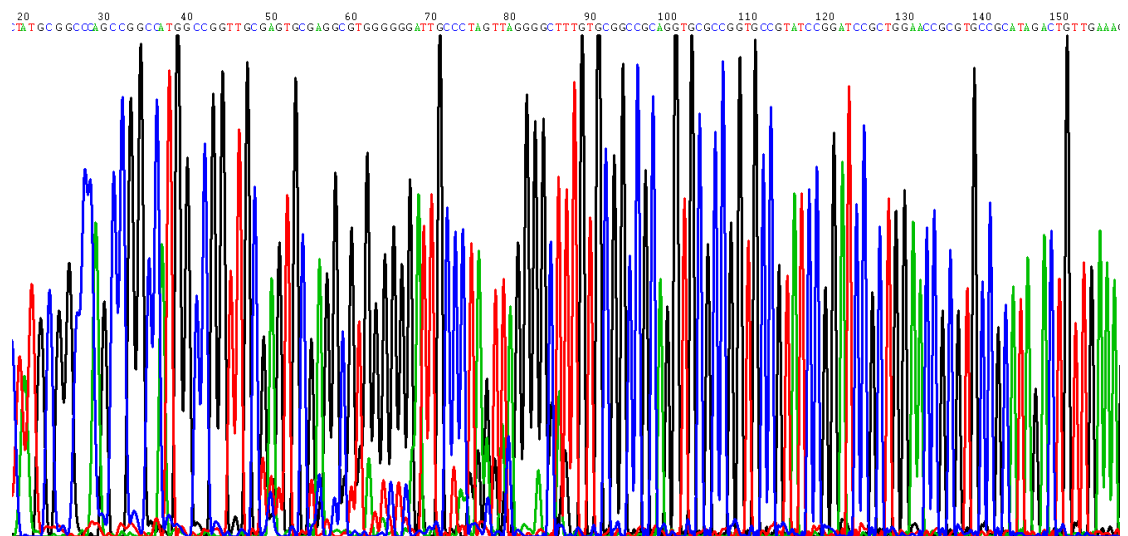

XM-6:

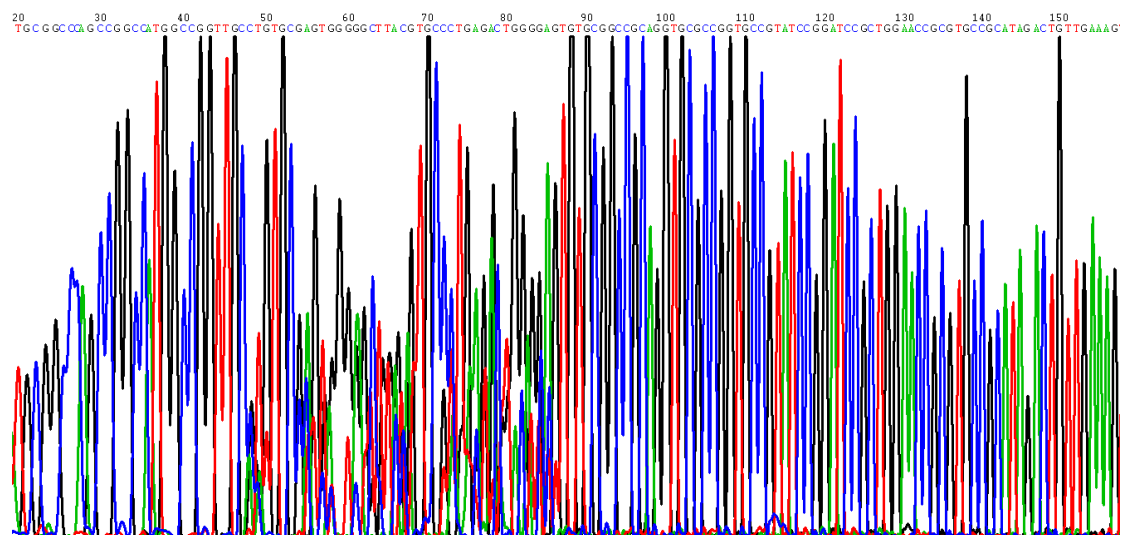

XM-7:

20 30 40 50 60 70 80 90 100 110 120 130 140 150  
TATCGGCGCAGCCGGCCATGGCCGGTTGCGCTTGCCCGGAGGGTCGGGATTGCGAGACGGGGAGCCGTGTGCGCCGCAAGGTGCGCCCGGTGCCGTATCCGGATCCCGTGGAAACCGCGTGCCGCATAGACTGTTGA

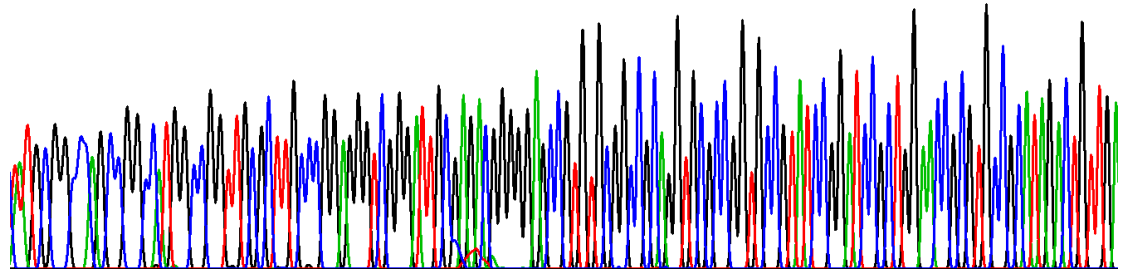

XM-8:

20 30 40 50 60 70 80 90 100 110 120 130 140 150  
TTCCTATGCGGCCAGCCGGCCATGGCCGGTTGCGCGGTGGGGGGGTGTGGAGTCGGAGACGGGTGAGCGTTGTGCGGCCGCAAGGTGCGCCCGGTGCCGTATCCGGATCCCGTGGAAACCGCGTGCCGCATAGACTGT

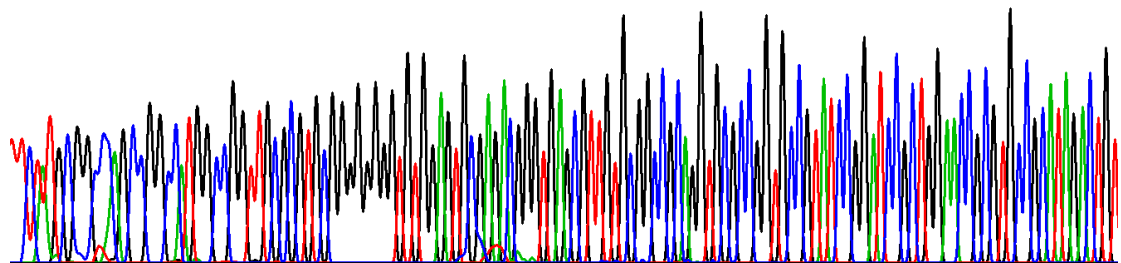

XM-9:

20 30 40 50 60 70 80 90 100 110 120 130 140 150  
TTCATGCGGCGCAGCCGGCATTGGCCGGTTGCGCGTGCCCTCAGTGGTAGGATTGCGGAGACTGGGGAGTTGTGTGCGGCGCGCAGGTGCGCCGGTGCCGTATCCGGATCCGCTGGAAACCGCGTGCCGCATAGACTGT:

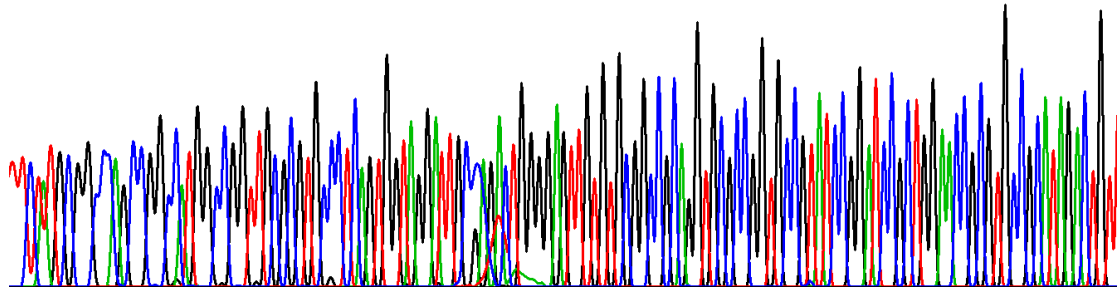

XM-10:

20 30 40 50 60 70 80 90 100 110 120 130 140 150  
TATGCGGCCAGCCGGCATTGGCCGGTTGCGGTGCTGGGAGGAGGAGGATTGCGGAGACGGGGAGCGGTGCTGCGGCCGCAAGGTGCGCCGCTGCGGTATCCCGATCCGCTGGAAACCGCGTGCCGCATAGACTGTTGAA,

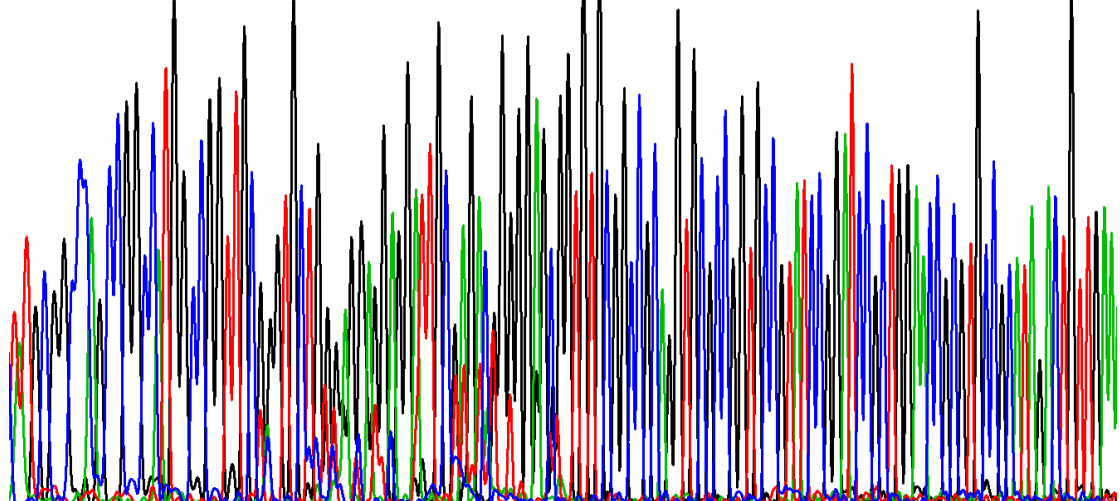

XM-11:

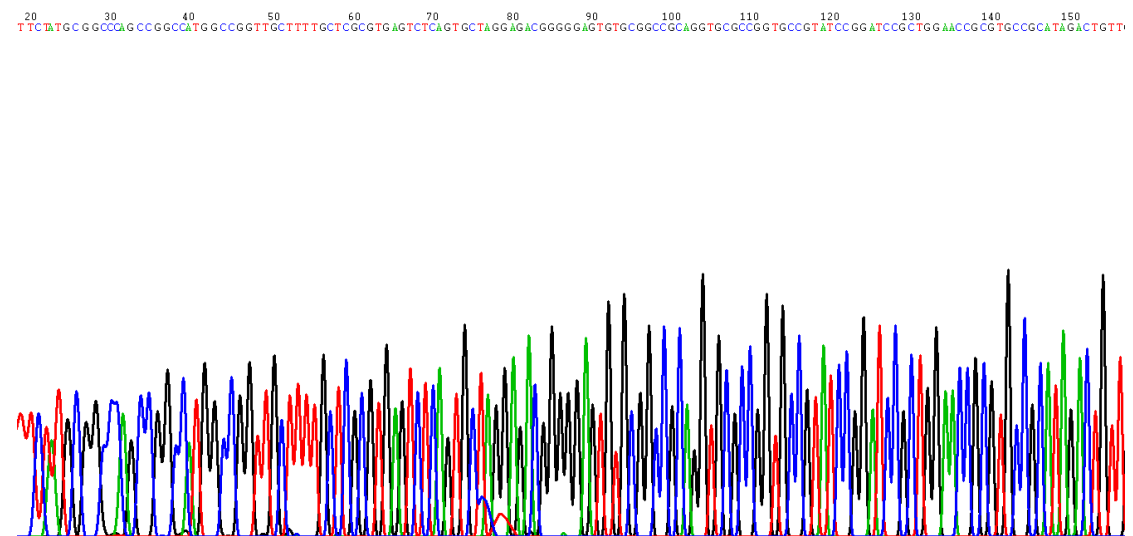

XM-12:

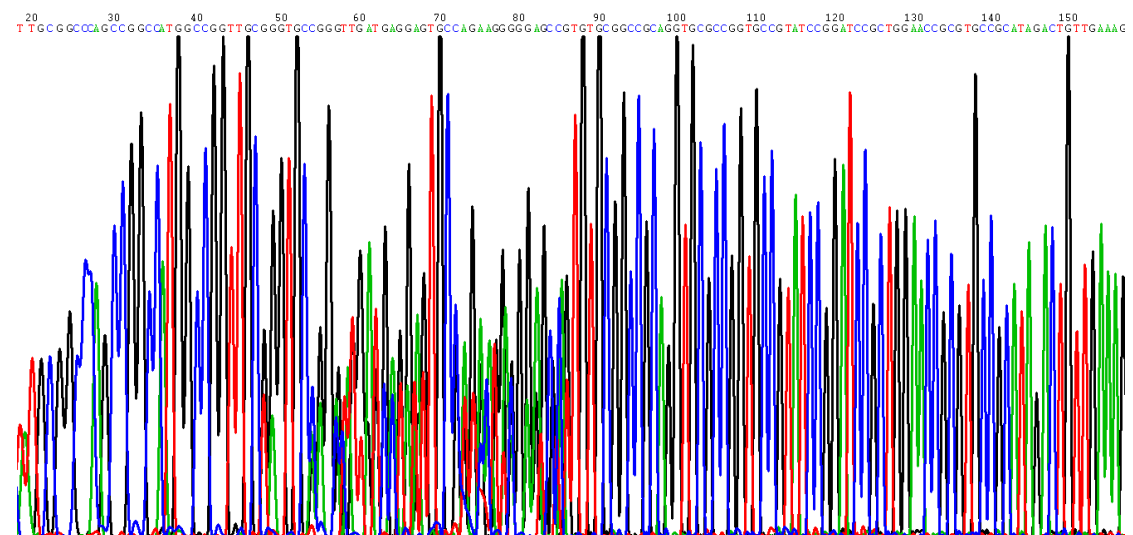

XM-13:

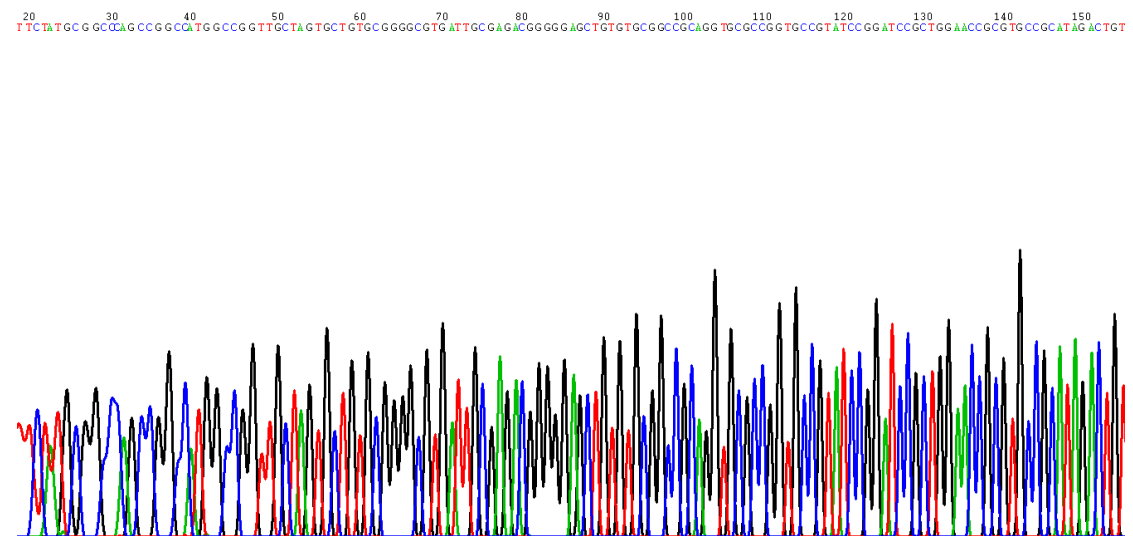

XM-14:

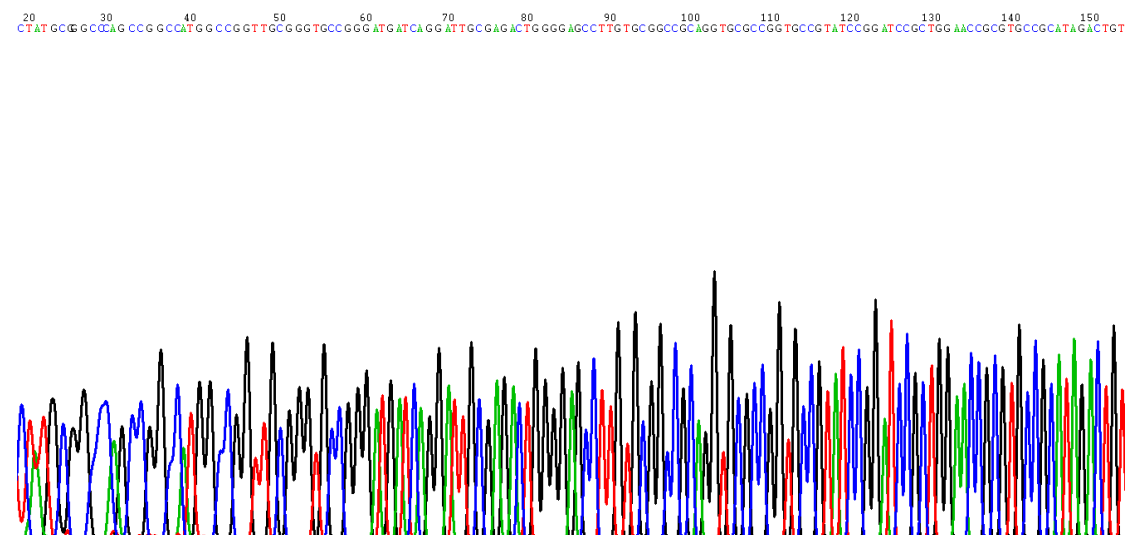



XM-15:

20 30 40 50 60 70 80 90 100 110 120 130 140 150  
TGC G G C C A G C C G G C C A T G G C C G G T T C C A G G T C C G A T T A G G A G T T G A T G T G C G T T G A G A C T G T G A G T G T G C G C C C C A G G T G C G C C G G T G C C G T A T C C G G A T C C G C T G G A A C C G C G T G C C G C A T A G A C T G T T G A

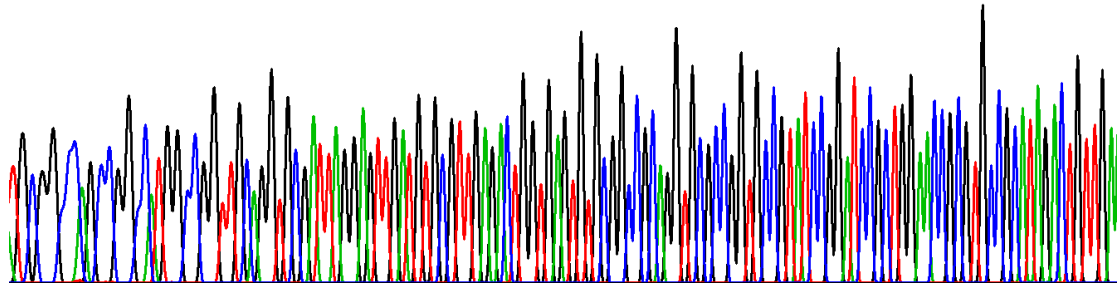

XM-16:

20 30 40 50 60 70 80 90 100 110 120 130 140 150  
T A T G C G G C A G C C G G C C A T G G C C G G T T G C G G G T G C T G G G G T G G G G C C G A T T G C G A G A C G G G G A G G C G T G T G C G C C C C A G G T G C C C G G T G C C G T A T C C G G A T C C G C T G G A A C C G C G T G C C G C A T A G A C T G T T G

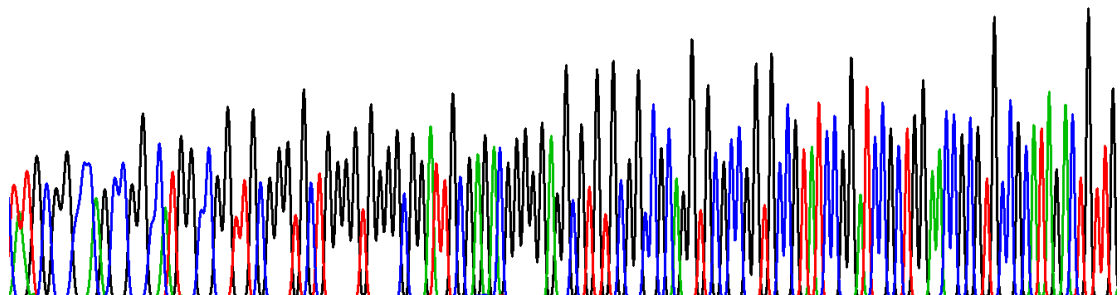

XM-17:

20 30 40 50 60 70 80 90 100 110 120 130 140 150  
TCATGCGGCCAGCCGGCCATGGGCCGGTTGCCAGTGTGGGATTAGGCGGATTGCGAGACTGGGATTCCGTGTGCGGCCGCCAGGTGCGCCGGTGTCCGTATCCGGATCCGCTGGAACCGCGTGCCGCATAGACTGTTGA

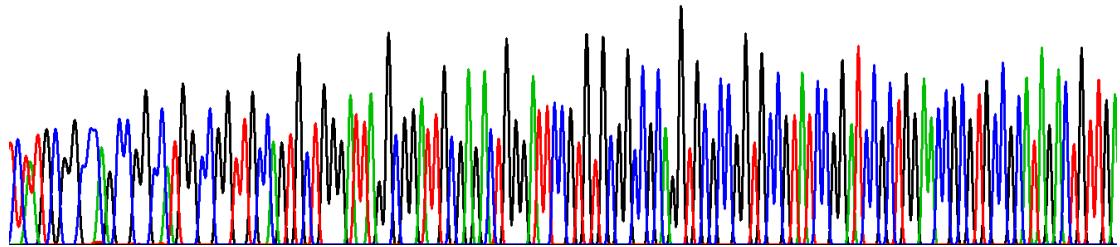

XM-18:

20 30 40 50 60 70 80 90 100 110 120 130 140 150  
CATTGCGGCCAGCCGGCCATGGGCCGGTTGCCAGTGTGGGCGGGGGGTTGGATTGCGAGACGGGGGACTGGTGTGCGGCCGCCAGGTGCGCCGGTGTCCGTATCCGGATCCGCTGGGAACCGCGTGCCGCATAGACTGTTGA

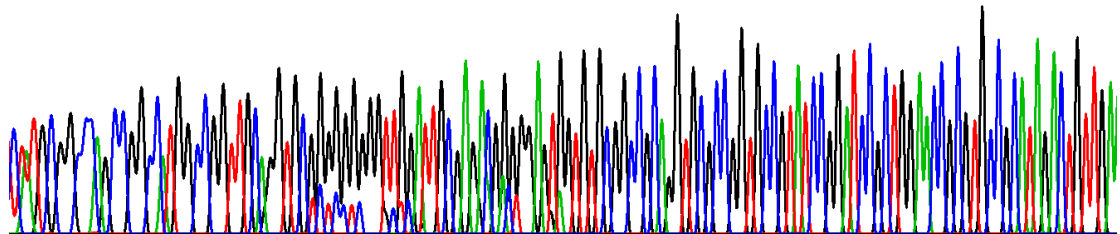

XM-19:

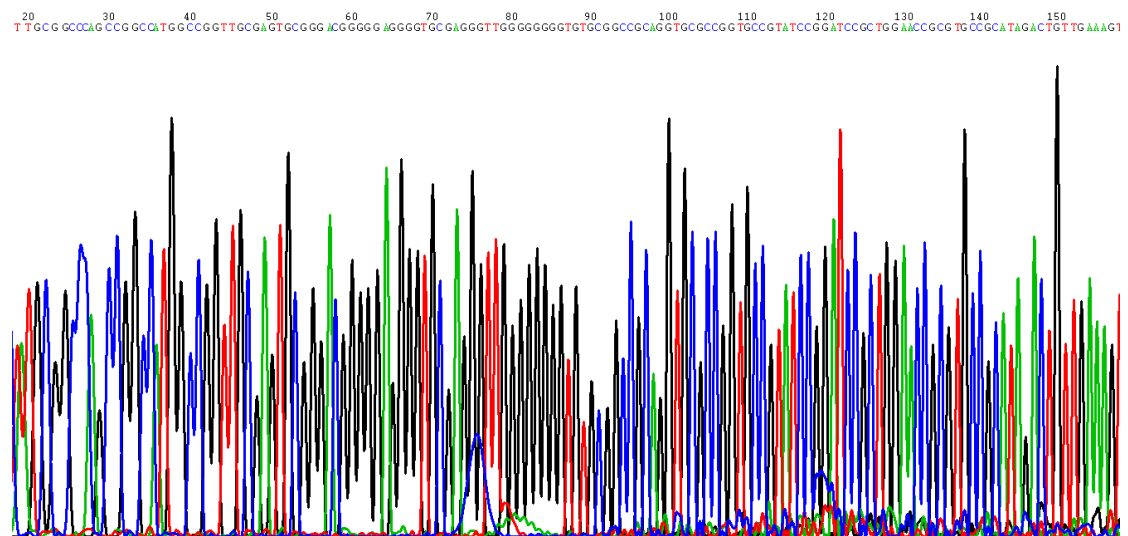

XM-20:

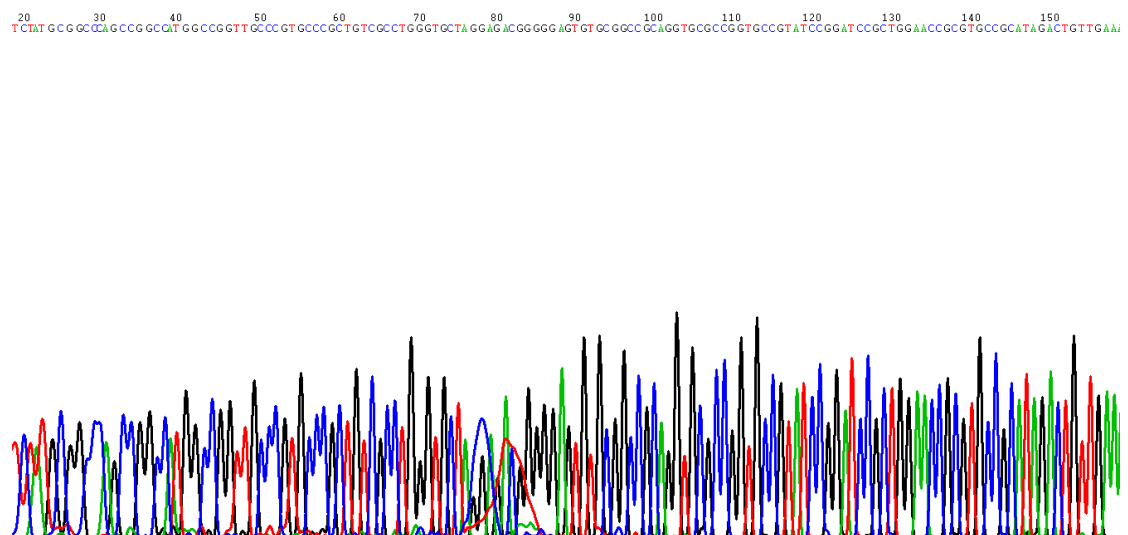

XM-21:

20 30 40 50 60 70 80 90 100 110 120 130 140 150  
TAT GCG GCCA GCG GCAT GGC GGT TGC GGT GCG GGG AGG AT GAG GAG TGC GAG ACT GGG GAG CCT TGT GCG GCG CAG GTG CCG CGG TGC CGT ATC CGG AT CCG CTG GAA CCG CGT CCG CAT AG ACT GTT GAA AGT

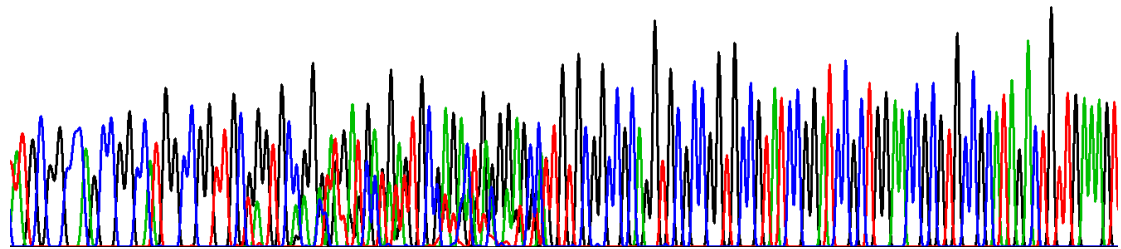

XM-22:

20 30 40 50 60 70 80 90 100 110 120 130 140 150  
TAT GCG GCCA GCG GCAT GGC GGT TGC GGT GCG GGG GGG GGG GTT GCT GGT ATC TGG GTAGT GTG CGG GCG CAG GTG CCG CGG TGC CGT ATC CGG ATC CGG CTG GAA CCG CGT CCG CAT AG ACT GTT GAA AGT

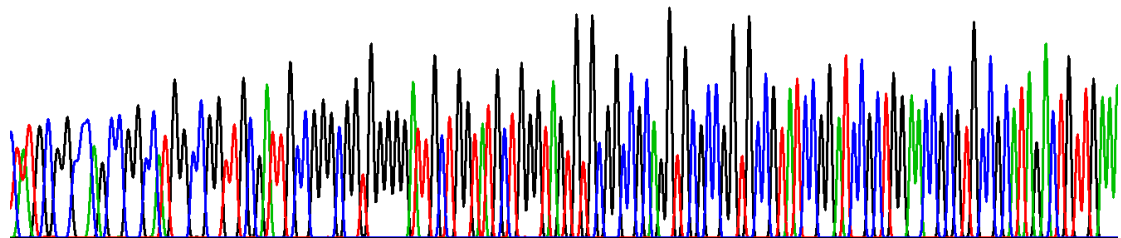

XM-23:

20 30 40 50 60 70 80 90 100 110 120 130 140 150  
TATGGGCGGAGCCGGCGATGGCCGGTTGCTAGTGCTGTGGCGTGCCTTTCTTGTATGTGGGGGGGTGTGGCGCCGCAAGGTGCCCGGGTGCCTGTATCCGGATCCGCTGGAAACCGCGTGCCTGCATAGACTGTGAAA

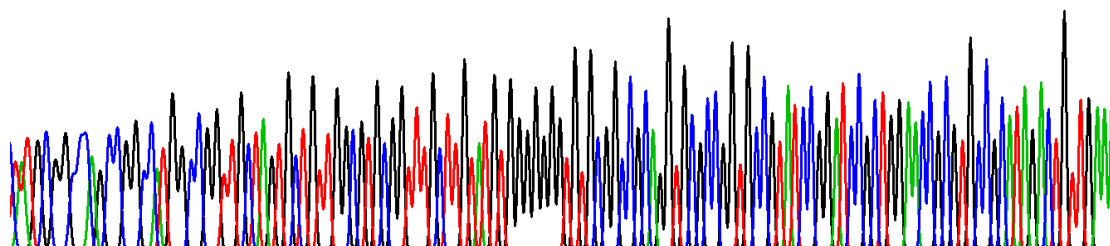

Supplement: c7cc09142g1.pdf [file c7cc09142g1.pdf]
